# Supplementary material for: One-step generation of knockout pigs by zygote injection of CRISPR/Cas system
Source: PubMed Central journal article supplement — Cell Res. 2014 Jan 31;24(3):372–5. doi: 10.1038/cr.2014.11 (PMC3945887; doi:10.1038/cr.2014.11), 2014-01-31
Supplement: cr201411x1.pdf [file cr201411x1.pdf]

## Supplementary Figure 1

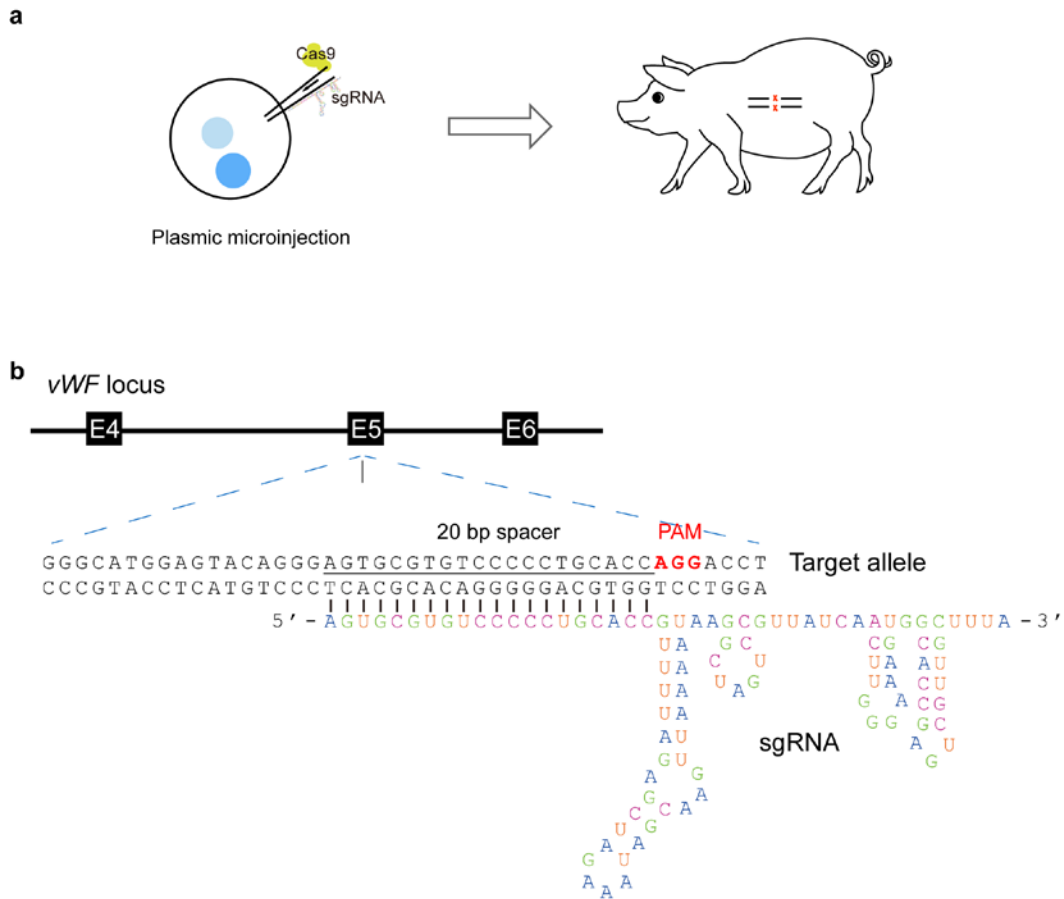

**Supplementary Figure S1 Schematic diagram of generation of *vWF* targeted pigs by zygote injection of Cas9 mRNA/sgRNA.** (a) *In vitro* transcribed Cas9 mRNA and sgRNA-*vWF* were co-injected into the cytoplasm of one-cell stage pig embryos. Then the injected embryos were transferred into recipient gilts to obtain gene disrupted piglets. (b) Strategy for sgRNA-mediated *vWF* targeting. The target site of *vWF* locus was at the fifth exon, and the sequences of target site and sgRNA-*vWF* were presented.
