# Supplementary material for: One-step generation of knockout pigs by zygote injection of CRISPR/Cas system
Source: PubMed Central journal article supplement — Cell Res. 2014 Jan 31;24(3):372–5. doi: 10.1038/cr.2014.11 (PMC3945887; doi:10.1038/cr.2014.11), 2014-01-31
Supplement: cr201411x2.pdf [file cr201411x2.pdf]

## Supplementary Figure 2

**a**

Potential off-target site 1:

Chromosome: 12

Query 9 TCCCCTGCACCAGG 23  
 |||  
 Sbjct 23955230 TCCCCTGCACCAGG 23955244

Potential off-target site 3:

Query 9 TCCCCTGCACCAGG 23  
 |||  
 Sbjct 75049055 TCCCCTGCACCAGG 75049041  
 Chromosome 5

Potential off-target site 5:

Query 7 TGTCCTGCACCAGG 23  
 |||  
 Sbjct 184835830 TGTCCTGCACCAGG 184835846  
 Chromosome 1

Potential off-target site 7:

Query 8 GTCCCTGCACCAGG 23  
 |||  
 Sbjct 47164181 GTCCCTGCACCAGG 47164166  
 Chromosome 15

Potential off-target site 9:

Query 9 TCCCCTGCACCAGG 23  
 |||  
 Sbjct 153963836 TCCCCTGCACCAGG 153963822  
 Chromosome 2

Potential off-target site 11:

Query 1 TCCCCTGCACCAGG 15  
 |||  
 Sbjct 70556960 TCCCCTGCACCAGG 70556946  
 Chromosome 13

Potential off-target site 2:

Chromosome: 5

Query 10 CCCCTGCACCAGG 23  
 |||  
 Sbjct 23957304 CCCCTGCACCAGG 23957291

Potential off-target site 4:

Query 7 TGTCCTGCACCAGG 23  
 |||  
 Sbjct 184622440 TGTCCTGCACCAGG 184622424  
 Chromosome 1

Potential off-target site 6:

Query 8 GTCCCTGCACCAGG 23  
 |||  
 Sbjct 304696826 GTCCCTGCACCAGG 304696841  
 Chromosome 1

Potential off-target site 8:

Query 8 GTCCCTGCACCAGG 23  
 |||  
 Sbjct 57260515 GTCCCTGCACCAGG 57260530  
 Chromosome 15

Potential off-target site 10:

Query 9 TCCCCTGCACCAGG 23  
 |||  
 Sbjct 28242978 TCCCCTGCACCAGG 28242964  
 Chromosome 10

Potential off-target site 12:

Query 1 TCCCCTGCACCAGG 15  
 |||  
 Sbjct 26399419 TCCCCTGCACCAGG 26399405  
 Chromosome 13

**b**

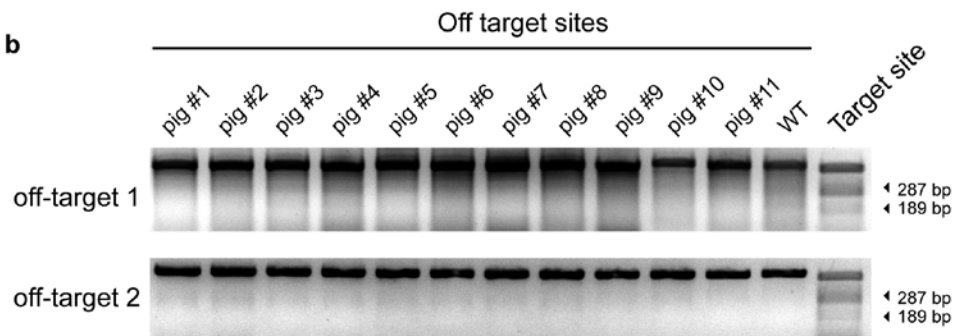

**C**

|                   |                                                                             |    |
|-------------------|-----------------------------------------------------------------------------|----|
| Wild-type control | GATTCAACAAATATTTTCAAAGCT <u>CCCCCTGCACC</u> <b>AGG</b> AATATAATGTTACAGAACA  |    |
| Pig #9            | GATTCAACAAATATTTTCAAAGCTCCCCCTGCACCAGGAATATAATGTTACAGAACA                   | wt |
| Pig #10           | GATTCAACAAATATTTTCAAAGCTCCCCCTGCACCAGGAATATAATGTTACAGAACA                   | wt |
| Pig #11           | GATTCAACAAATATTTTCAAAGCTCCCCCTGCACCAGGAATATAATGTTACAGAACA                   | wt |
| Wild-type control | GTTAATGAGATAAGATGTCTTT <u>GTCCCCCTGCACC</u> <b>AGG</b> TCCCATCCAGTGCCTACAG  |    |
| Pig #9            | GTTAATGAGATAAGATGTCTTTGTCCCCCTGCACCAGGTCCCATCCAGTGCCTACAG                   | wt |
| Pig #10           | GTTAATGAGATAAGATGTCTTTGTCCCCCTGCACCAGGTCCCATCCAGTGCCTACAG                   | wt |
| Pig #11           | GTTAATGAGATAAGATGTCTTTGTCCCCCTGCACCAGGTCCCATCCAGTGCCTACAG                   | wt |
| Wild-type control | GTTAATGAGATAAGATGTCTTT <u>GTCCCCCTGCACC</u> <b>AGG</b> TCCCATCCAGTGCCTACAG  |    |
| Pig #9            | GTTAATGAGATAAGATGTCTTTGTCCCCCTGCACCAGGTCCCATCCAGTGCCTACAG                   | wt |
| Pig #10           | GTTAATGAGATAAGATGTCTTTGTCCCCCTGCACCAGGTCCCATCCAGTGCCTACAG                   | wt |
| Pig #11           | GTTAATGAGATAAGATGTCTTTGTCCCCCTGCACCAGGTCCCATCCAGTGCCTACAG                   | wt |
| Wild-type control | TGCTGCTGTCAGTTTGGGTACCGT <u>CCCCCTGCACC</u> <b>AGG</b> GTGGGAATATGCCCTGG    |    |
| Pig #9            | TGCTGCTGTCAGTTTGGGTACCGTCCCCCTGCACCAGGGTGGGAATATGCCCTGG                     | wt |
| Pig #10           | TGCTGCTGTCAGTTTGGGTACCGTCCCCCTGCACCAGGGTGGGAATATGCCCTGG                     | wt |
| Pig #11           | TGCTGCTGTCAGTTTGGGTACCGTCCCCCTGCACCAGGGTGGGAATATGCCCTGG                     | wt |
| Wild-type control | GGCCAACCTGCAGCATATGGAGGT <u>CCCCCTGCACC</u> <b>AGG</b> GATTGAATCCAAGCTGCAG  |    |
| Pig #9            | GGCCAACCTGCAGCATATGGAGGTCCCCCTGCACCAGGGATTGAATCCAAGCTGCAG                   | wt |
| Pig #10           | GGCCAACCTGCAGCATATGGAGGTCCCCCTGCACCAGGGATTGAATCCAAGCTGCAG                   | wt |
| Pig #11           | GGCCAACCTGCAGCATATGGAGGTCCCCCTGCACCAGGGATTGAATCCAAGCTGCAG                   | wt |
| Wild-type control | TTATTTTCATTGAGATTACCCAAGT <u>CCCCCTGCACC</u> <b>AGG</b> TCCCCTTTCCAGTTGCTGT |    |
| Pig #9            | TTATTTTCATTGAGATTACCCAAGTCCCCCTGCACCAGGTCCCCTTTCCAGTTGCTGT                  | wt |
| Pig #10           | TTATTTTCATTGAGATTACCCAAGTCCCCCTGCACCAGGTCCCCTTTCCAGTTGCTGT                  | wt |
| Pig #11           | TTATTTTCATTGAGATTACCCAAGTCCCCCTGCACCAGGTCCCCTTTCCAGTTGCTGT                  | wt |
| Wild-type control | GAGCTGTGAGCTGGCGGTGTTTCT <u>CCCCCTGCACC</u> <b>AGG</b> ACACCCGACCCAAGGATCT  |    |
| Pig #9            | GAGCTGTGAGCTGGCGGTGTTTCTCCCCCTGCACCAGGACACCCGACCCAAGGATCT                   | wt |
| Pig #10           | GAGCTGTGAGCTGGCGGTGTTTCTCCCCCTGCACCAGGACACCCGACCCAAGGATCT                   | wt |
| Pig #11           | GAGCTGTGAGCTGGCGGTGTTTCTCCCCCTGCACCAGGACACCCGACCCAAGGATCT                   | wt |
| Wild-type control | GGACTTATGGGTGGCGGGGCCACT <u>CCCCCTGCACC</u> <b>AGG</b> CAGAGGGCCAGACTGCTC   |    |
| Pig #9            | GGACTTATGGGTGGCGGGGCCACTCCCCCTGCACCAGGCAGAGGGCCAGACTGCTC                    | wt |
| Pig #10           | GGACTTATGGGTGGCGGGGCCACTCCCCCTGCACCAGGCAGAGGGCCAGACTGCTC                    | wt |
| Pig #11           | GGACTTATGGGTGGCGGGGCCACTCCCCCTGCACCAGGCAGAGGGCCAGACTGCTC                    | wt |
| Wild-type control | TGTTTTAACCCCATTTGGATGTTTT <u>CCCCCTGCACC</u> <b>AGG</b> CCATTTCTCCATCCTGTGG |    |
| Pig #9            | TGTTTTAACCCCATTTGGATGTTTTCCCCCTGCACCAGGCCATTTCTCCATCCTGTGG                  | wt |
| Pig #10           | TGTTTTAACCCCATTTGGATGTTTTCCCCCTGCACCAGGCCATTTCTCCATCCTGTGG                  | wt |
| Pig #11           | TGTTTTAACCCCATTTGGATGTTTTCCCCCTGCACCAGGCCATTTCTCCATCCTGTGG                  | wt |
| Wild-type control | CAGCTGCAACCTCAGATACTTTAT <u>CCCCCTGCACC</u> <b>AGG</b> CCAGGGACTGAACCTGCAT  |    |
| Pig #9            | CAGCTGCAACCTCAGATACTTTATCCCCCTGCACCAGGCCAGGGACTGAACCTGCAT                   | wt |
| Pig #10           | CAGCTGCAACCTCAGATACTTTATCCCCCTGCACCAGGCCAGGGACTGAACCTGCAT                   | wt |
| Pig #11           | CAGCTGCAACCTCAGATACTTTATCCCCCTGCACCAGGCCAGGGACTGAACCTGCAT                   | wt |

**Supplementary Figure S2 Off-targets analysis in *vWF* mutant pigs.** (a) Based on the prediction method, the potential off-target sites of sgRNA-*vWF* are indicated, and PAM site is shown in red

bold letter. (b) T7EI analysis of two potential off-target sites in all the 11 mutant piglets, and no off-target cleavage was detected. (c) Sanger sequencing of 10 randomly selected off-target sites in three biallelic mutant pigs.
