# Supplementary material for: One-step generation of knockout pigs by zygote injection of CRISPR/Cas system
Source: PubMed Central journal article supplement — Cell Res. 2014 Jan 31;24(3):372–5. doi: 10.1038/cr.2014.11 (PMC3945887; doi:10.1038/cr.2014.11), 2014-01-31
Supplement: cr201411x3.pdf [file cr201411x3.pdf]

### Supplementary Figure 3

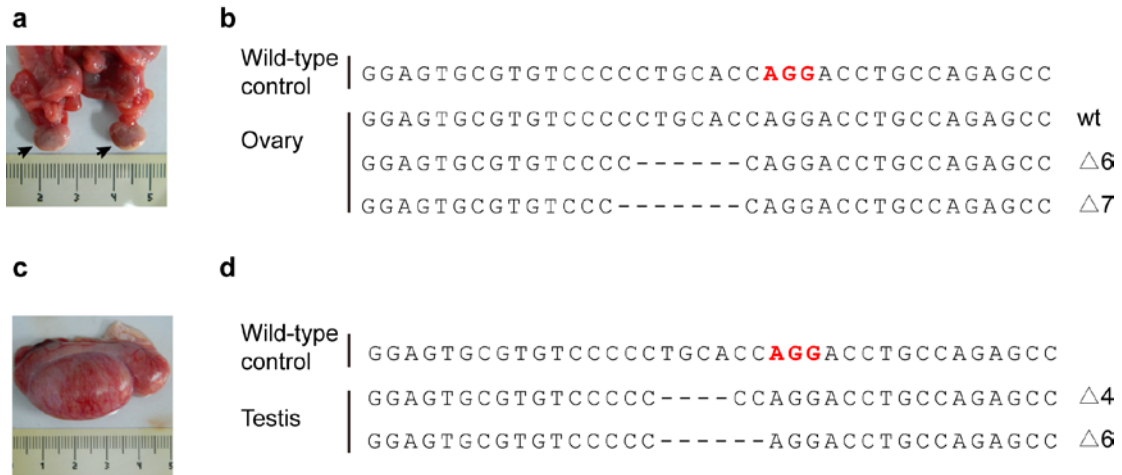

**Supplementary Figure S3 *vWF* genotyping in ovary and testis of mutant pigs.** (a) Dissected ovary of a monoallelic mutant pig. (b) Sanger sequencing of the *vWF* targeting site of the ovary. The PAM sequence is bold and labeled in red. On the right side of each allele, the sizes of deletions ( $\Delta$ ) are indicated between brackets. (c) Dissected testis of a biallelic mutant pig. (d) Sanger sequencing of the *vWF* targeting site of the testis. The PAM sequence is bold and labeled in red. On the right side of each allele, the sizes of deletions ( $\Delta$ ) are indicated between brackets.
