# Supplementary material for: One-step generation of knockout pigs by zygote injection of CRISPR/Cas system
Source: PubMed Central journal article supplement — Cell Res. 2014 Jan 31;24(3):372–5. doi: 10.1038/cr.2014.11 (PMC3945887; doi:10.1038/cr.2014.11), 2014-01-31
Supplement: cr201411x4.pdf [file cr201411x4.pdf]

**Supplementary Table S1. *In vitro* developmental efficiency of embryos injected with Cas9 mRNA/sgRNA**

| Embryo types            | Injected content | No. of 1-cell embryos | No. of 2-cell embryos | No. of blastocyst |
|-------------------------|------------------|-----------------------|-----------------------|-------------------|
| Parthenogenetic embryos | H <sub>2</sub> O | 160                   | 114(71.25%)           | 45(39.47%)        |
|                         | Cas9 mRNA /sgRNA | 152                   | 97(63.8%)             | 37(38.14%)        |
| zygotes                 | H <sub>2</sub> O | 15                    | 13(86.67%)            | 10(76.92%)        |
|                         | Cas9 mRNA /sgRNA | 35                    | 33(94.28%)            | 26(78.79%)        |

2-10 pl of 125 ng/ul Cas9 mRNA and 12.5 ng/ul sgRNA were injection into cytoplasm of embryos, H<sub>2</sub>O injection used as control.
