# Supplementary material for: One-step generation of knockout pigs by zygote injection of CRISPR/Cas system
Source: PubMed Central journal article supplement — Cell Res. 2014 Jan 31;24(3):372–5. doi: 10.1038/cr.2014.11 (PMC3945887; doi:10.1038/cr.2014.11), 2014-01-31
Supplement: cr201411x5.pdf [file cr201411x5.pdf]

---

**Supplementary Table S2. Hematological analysis of pigs among different genotypes**

|                                | Wild-type       | Monoallelic    | Biallelic       |
|--------------------------------|-----------------|----------------|-----------------|
| PT (sec)                       | 9.40 ± 0.52     | 9.30 ± 0.26    | 9.10 ± 0.34     |
| Platelets (10 <sup>9</sup> /L) | 634.00 ± 115.13 | 648.00 ± 74.64 | 613.20 ± 111.57 |
| RBC (10 <sup>12</sup> /L)      | 5.97 ± 0.98     | 6.23 ± 0.33    | 5.44 ± 0.96     |
| WBC (10 <sup>9</sup> /L)       | 14.02 ± 2.67    | 9.18 ± 1.86    | 11.00 ± 2.82    |
| Hematocrit (%)                 | 39.12 ± 3.92    | 41.17 ± 1.19   | 36.50 ± 5.81    |
| Hemoglobin (g/L)               | 119.67 ± 13.57  | 127.00 ± 3.61  | 111.60 ± 17.94  |

No significant difference ( $p > 0.05$ ) was found in any parameter among different genotypes.
