# Supplementary material for: One-step generation of knockout pigs by zygote injection of CRISPR/Cas system
Source: PubMed Central journal article supplement — Cell Res. 2014 Jan 31;24(3):372–5. doi: 10.1038/cr.2014.11 (PMC3945887; doi:10.1038/cr.2014.11), 2014-01-31
Supplement: cr201411x7.pdf [file cr201411x7.pdf]

## Supplementary information, Data S2 Sequences

Red highlighted sequences represent T7 promoter; blue highlighted sequences represent the sgRNA scaffold; red bold letters represent spacer sequence; Cas9 CDS is highlighted in green. Gray and blue italic letters represent PsiI and HindIII restriction sites, respectively.

>pUC19-T7-sgRNA-*vWF* (PsiI)

TAATACGACTCACTATA**GGAGTGCCTGTCCCCCTGCACCG**TTTATAGAGCTAGAAAATAGCAAGTTAAAATAAGGCTAGTCCG  
TTATCAACTTGAAAAAGTGGCACCAGTCCGGTGT*TATA*AGGGGATCCTCTAGAGTGCACCTGCAGGCATGCAAGCTTGGC  
GTAATCATGGTCATAGCTGTTTCTGTGTGAAATTGTTATCCGCTCACAATCCACACAACATACGAGCCGGAAGCATAAAGT  
GTAAAGCCTGGGGTGCCTAATGAGTGAGCTAACTCACATTAATTGCGTTGCGCTCACTGCCCGCTTCCAGTCGGGAAACCT  
GTCTGTCCAGCTGCATTAATGAATCGGCCAACGCGCGGGGAGAGGCGGTTTTCGTATTGGGCGCTCTTCCGCTTCTCGCTC  
ACTGACTCGCTGCGCTCGGTCGGTTCGGCTGCGGCGAGCGGTATCAGCTCACTCAAAGGCGGTAATACGGTTATCCACAGAAT  
CAGGGGATAACGCAGGAAAGAATGTGAGCAAAAAGGCCAGCAAAAAGGCCAGGAACCGTAAAAAGGCCGCGTTGCTGGC  
GTTTTTCCATAGGCTCCGCCCCCTGACGAGCATCACAAAATCGACGCTCAAGTCAGAGGTGGCGAAACCCGACAGGACT  
ATAAAGATACCAGGCGTTTCCCCTGGAAGCTCCCTCGTGCCTCTCTGTTCCGACCCTGCCCTTACCGGATACCTGTCCG  
CCTTCTCCCTTCGGGAAGCGTGGCGCTTTCTCATAGCTCAGCTGTAGGTATCTCAGTTCGGTGTAGGTCTGTTCCGCTCAAG  
CTGGGCTGTGTGCACGAACCCCCGTTACGCCGACCGTGCCTTATCCGGTAACTATCGTCTTGAGTCAACCCGGTAA  
GACAGGACTTATCGCCACTGGCAGCAGCCACTGGTAACAGGATTAGCAGAGCGAGGTATGTAGGCGGTGCTACAGAGTTCT  
TGAAGTGGTGGCCTAACTACGGCTACACTAGAAGAACAGTATTTGGTATCTGCGCTCTGCTGAAGCCAGTTACCTTCGGAAA  
AAGAGTTGGTAGCTCTTGATCCGGCAAACAAACCACCGTGGTAGCGGTGTTTTTTGTTTGCAAGCAGCAGATTACGCGC  
AGAAAAAAGGATCTCAAGAAGATCCTTTGATCTTTTCTACGGGGTCTGACGCTCAGTGAACGAAAACTCACGTTAAGGG  
ATTTTGGTCATGAGATTATCAAAAAGGATCTTACCTAGATCCTTTTAAATTAATAAAGTATTTTAAATCAATCTAAAGTATAT  
ATGAGTAAACTTGGTCTGACAGTTACCAATGCTTAATCAGTGAGGCACCTATCTCAGCGATCTGTCTATTTCTGTTCCATCCATAG  
TTGCCTGACTCCCCGTCGTGTAGATAACTACGATACGGGAGGGCTTACCATCTGGCCCCAGTGTGCAATGATACCCGCTGA  
GCCACGCTCACCGGCTCCAGATTTATCAGCAATAAACCAGCCAGCCGGAAGGGCCGAGCGCAGAAGTGGTCTGCAACTTT  
ATCCGCTCCATCCAGTCTATTAATTGTTGCCGGGAAGCTAGAGTAAGTAGTTCGCCAGTTAATAGTTTGGCAACGTTGTTG  
CCATGCTACAGGCATCGTGGTGTACGCTCGTCGTTTGGTATGGCTTCAATCAGCTCCGGTCCCAACGATCAAGGCGAGTT  
ACATGATCCCCATGTTGTGCAAAAAGCGGTTAGCTCCTTCGGTCTCCGATCGTTGTGCAAGTAAGTTGGCCGAGTGT  
TACTACTCATGGTTATGGCAGCACTGCATAATCTCTTACTGTCATGCCATCCGTAAGATGCTTTTCTGTGACTGGTGAAGTACT  
CAACCAAGTCATTCTGAGAATAGTGTATGCGGCGACCGAGTTGCTCTTGGCCGCGTCAATACGGGATAATACCGCGCCACA  
TAGCAGAACTTTAAAAGTGTCTATCATTGGAAAACGTTCTTCGGGGCGAAAACCTCTCAAGGATCTTACCGCTGTTGAGATCC  
AGTTCGATGTAACCCACTCGTGCACCAACTGATCTTCAGCATCTTTTACTTTTACCAGCGTTTCTGGGTGAGCAAAAACAG  
GAAGGCAAAAATGCCGCAAAAAGGGAATAAGGGCGACACGAAATGTTGAATACTATACTTCTCTTTTCAATATTATTG  
AAGCATTATCAGGGTTAATGTCTCATGAGCGGATACATAATTTGAATGTAATTTAGAAAAATAACAAATAGGGGTTCCGCGCAC  
ATTTCCCGAAAAGTGCCACCTGACGTCTAAGAAACCATTATATCATGACATTAACCTATAAAAATAGGCGTATCACGAGGC  
CCTTTCGCTCTCGCGCTTTCGGTGTGACGGTGAACCTCTGACACATGCAGTCCCGGAGACGGTACAGCTTGTCTGTGA  
AGCGGATGCCGGGAGCAGACAAGCCGTCAGGGCGGTCAGCGGTGTTGGCGGGTGTGCGGGCTGGCTTAACTATGCGG  
CATCAGAGCAGATTGTAAGTGCACCATATGCGGTGTGAAATACCGCACAGATGCGTAAGGAGAAAATACCGCATCAG  
GCGCCATTCGCCATTCAGGCTGCCTAACTGTTGGGAAGGGCGATCGGTGCGGGCTCTTCGCTATTACCGCAGCTGGCGAA  
AGGGGGATGTGCTGCAAGGCGATTAAGTTGGGTAACGCCAGGGTTTTCCAGTACGACGTTGTAACGACGGCCAGTGA  
ATTCGAGCTCGGTACCC

>pEASY-T7-Cas9-SV40 pA (HindIII)

TAATACGACTCACTATA**AGG**GCGAATTGGGCCCTCTAGAGCTAGCATGGACTATAAGGACCACGACGGAGACTACAAGGATCA  
TGATATTGATTACAAAAGACGATGACGATAAGATGGCCCCAAAGAAGAAGCGGAAGGTCGGTATCCACGGAGTCCCAGCA**GC**

CGACAAGAAGTACAGCATCGGCCTGGACATCGGCACCAACTCTGTGGGCTGGGCCGTGATCACCAGAGTACAAGGTGCC  
CAGCAAGAAATCAAGGTGCTGGGCAACACCGACCGGCACAGCATCAAGAAGAACTGATCGGAGCCCTGCTGTTGACA  
GCGGCGAAACAGCCGAGGCCACCCGGCTGAAGAGAACCCGCAAGAAGAATACACCAGACGGAAGAACC GGATCTGCTAT  
CTGCAAGAGATCTTCAGCAACGAGATGGCCAAGGTGGACGACAGCTTCTTCCACAGACTGGAAGAGTCCTTCTGGTGA  
AGAGGATAAGAAGCACGAGCGGCACCCCATCTTCGGCAACATCGTGGACGAGGTGGCTACCACGAGAAGTACCCACCAT  
CTACCACCTGAGAAAGAACTGGTGGACAGCACCGACAAGGCCGACCTGCGGCTGATCTATCTGGCCCTGGCCACATGAT  
CAAGTTCGGGGCCACTTCTGATCGAGGGCGACCTGAACCCGACAACAGCGACGTGGACAAGCTGTTTCATCCAGCTGGT  
GCAGACCTACAACCAGCTGTTCGAGGAAAACCCATCAACGCCAGCGGCTGGACGCCAAGGCCATCTGTCTGCCAGACT  
GAGCAAGAGCAGACGGCTGGAAAATCTGATCGCCAGCTGCCCCGGCGAGAAGAAGAATGGCCTGTTTCGGCAACCTGATTG  
CCCTGAGCCTGGGCTGACCCCAACTTCAAGAGCAACTTCGACCTGGCCGAGGATGCCAACTGCAGCTGAGCAAGGAC  
ACCTACGACGACGACCTGGACAACCTGCTGGCCAGATCGGCGACCAGTACGCGGACCTGTTTCTGGCCGCAAGAACCTG  
TCCGACGCCATCTGCTGAGCGACATCCTGAGAGTGAACACCGAGATCACCAAGGCCCCCTGAGCGCCTCTATGATCAAG  
AGATACGACGAGCACCACCAGGACCTGACCTGTCTAAGGCTCTCGTGGCGCAGCAGCTGCCTGAGAAGTACAAAGAGATT  
TTCTTCGACCAGAGCAAGAACGGCTACGCCGGCTACATTGACGGCGGAGCCAGCCAGGAAGAGTTTACAAGTTCATCAAG  
CCCATCTGGAAGATGGACGGCACCGAGGAACCTGCTCGTGAAGCTGAACAGAGAGGACCTGCTGCGGAAGCAGCGGA  
CCTTCGACAACGGCAGCATCCCCACCAGATCCACCTGGGAGAGCTGCACGCCATTCTGCGGCGGCAGGAAGATTTTACC  
CATTCTGAAGGACAACCGGAAAAGATCGAGAAGATCCTGACCTCCGCATCCCTACTACGTGGGCCCTCTGGCCAGGG  
GAAACAGCAGATTCGCTGGATGACCAGAAAAGAGCGAGGAAACCATACCCCTGGAACCTCGAGGAAGTGGTGGACAAG  
GGCGCTTCGCCCAGAGCTTCATCGAGCGGATGACCAACTTCGATAAGAACCTGCCAACGAGAAGGTGCTGCCAAGCAC  
AGCCTGCTGTACGAGTACTTACCGTGTATAACGAGCTGACCAAAAGTAAAATACGTGACCGAGGGAATGAGAAAAGCCGCC  
TTCTGAGCGGCGAGCAGAAAAAGGCCATCGTGGACCTGCTGTTCAAGACCAACCGGAAAAGTGACCGTGAAGCAGCTGAA  
AGAGGACTACTTCAAGAAAATCGAGTGCTTCGACTCCGTGGAAATCTCCGGCTGGAAGATCGGTTCACGCCTCCCTGGG  
CACATACCAGATCTGCTGAAAATATCAAGGACAAGGACTTCTGGACAAATGAGGAAAACGAGGACATTCTGGAAGATATC  
GTGCTGACCCTGACACTGTTTGGAGACAGAGAGATGATCGAGGAACGGCTGAAAACCTATGCCACCTGTTTCGACGACAAA  
GTGATGAAGCAGCTGAAGCGCGGAGATACACCGGTTGGGGCAGGCTGAGCCGGAAGCTGATCAACGGCATCCGGGACAA  
GCAGTCCGGCAAGACAATCCTGGATTCTGAAAGTCCGACGGCTTCGCCAACAGAAACTTCATGCAGCTGATCCACGACGA  
CAGCTGACCTTAAAGAGGACATCCAGAAAGCCAGGTGTCCGGCCAGGCGATAGCCTGCACGAGCACATTGCCAATCT  
GGCCGCGACCCCCCATTAAGAAGGGCATCTGCAGACAGTGAAGGTGGTGGACGAGCTCGTGAAGTGATGGGCCGGC  
ACAAGCCCGAGAACATCGTGATCGAAATGGCCAGAGAGAACCAGACCACCAGAAGGGACAGAAGAACAGCCGCGAGAG  
AATGAAGCGGATCGAAGAGGGCATCAAAGAGCTGGGACGCCAGATCCTGAAAGAACACCCCGTGGAAAACACCCAGCTGC  
AGAACGAGAAGCTGTACTGTACTACCTGCAGAAATGGGCGGATATGTACGTGGACCAGGAACTGGACATCAACCGGCTGT  
CCGACTACGATGTGGACATATCGTGCTCAGAGCTTTCTGAAGGACGACTCCATCGACAACAAGGTGCTGACCAGAAGCG  
ACAAGAACCGGGCAAGAGCGACAACGTGCCCTCCGAAGAGGTCTGGAAGAAGATGAAGAACTACTGGCGGCAGCTGCT  
GAACGCCAAGCTGATTACCCAGAGAAAAGTTTCGACAATCTGACCAAGGCCGAGAGAGGCGCCTGAGCGAAGTGGATAAGG  
CCGGCTTCATCAAGAGACAGCTGGTGGAAAACCCGCGAGATCACAAGCACGTGGCACAGATCCTGGACTCCCGGATGAAC  
ACTAAGTACGACGAGAATGACAAGCTGATCCGGGAAGTGAAAGTGATCACCTGAAGTCCAAGCTGGTGTCCGATTCCGG  
AAGGATTTCCAGTTTTACAAAGTGCAGGAGATCAACAACTACCACCACGCCACGACGCTTACCTGAACGCCGTCGTGGGA  
ACCGCCTGATCAAAAAGTACCCTAAGCTCGAGAGCGAGTTCGTGTACGGCGACTACAAGGTGTACGACGTGCGGAAGATG  
ATCGCCAAGAGCGAGCAGGAAATCGGCAAGGCTACCGCCAAGTACTTCTTCTACAGCAACATCATGAACTTTTCAAGACC  
GAGATTACCTGGCCAACGGCGAGATCCGGAAGCGGCTCTGATCGAGACAAACGGCGAAAACCGGGGAGATCGTGTGGGA  
TAAGGGCCGGGATTTTGCCACCGTGCAGAAAGTGCTGAGCATGCCCAAGTGAATATCGTGAAGAAGACCGAGGTGCAGAC  
AGGCGGCTTCAGCAAAGAGTCTATCTGCCCAAGAGGAACAGCGATAAGCTGATCGCCAGAAAAGAAGGACTGGGACCCTA  
AGAAGTACGGCGGCTTCGACAGCCCCACCGTGGCCTATTTCTGTGCTGGTGGTGGCCAAAGTGGAAGAAGGCAAGTCCAAG  
AACTGAAGAGTGTGAAGAGCTGCTGGGATCACCATCATGGAAGAAGCAGCTTCGAGAAGAATCCCATCGACTTCTG

GAAGCCAAGGGCTACAAAGAAGTGAAAAAGGACCTGATCATCAAGCTGCCTAAGTACTCCCTGTTCGAGCTGGAAAACGG  
CCGGAAGAGAATGCTGGCCTCTGCCGGCGAACTGCAGAAGGGAAACGAACTGGCCCTGCCCTCCAAATATGTGAACCTCT  
GTACCTGGCCAGCCACTATGAGAAGCTGAAGGGCTCCCCGAGGATAATGAGCAGAAACAGCTGTTTGTGGAACAGCACAA  
GCACTACCTGGACGAGATCATCGAGCAGATCAGCGAGTTCTCCAAGAGAGTGATCTGGCCGACGCTAATCTGGACAAAGT  
GCTGTCCGCTACAACAAGCACCGGGATAAGCCATCAGAGAGCAGGCCGAGAATATCATCCACCTGTTTACCCTGACCAAT  
CTGGGAGCCCCCTGCCGCTTCAAGTACTTTGACACCACCATCGACCCGAAGAGGTACACCAGCACCAAAGAGGTGCTGGA  
CGCCACCCTGATCCACCAGAGCATCACCGGCTGTACGAGACACGGATCGACCTGTCTCAGCTGGGAGGCGAC AAGCGTCC  
TGCTGCTACTAAGAAAGCTGGTCAAGCTAAGAAAAAGAAATAAGAATTCGGATCCAATCAACCTCTGGATTACAAAATTGT  
GAAAGATTGACTGGTATTCTTAAGTATGTTGCTCCTTTTACGCTATGTGGATACGCTGCTTTAATGCCTTTGTATCATGCGTTGT  
TTATTGCAGCTTATAATGGTTACAAATAAAGCAATAGCATCACAAATTCACAAATAAAGCATTTTTTCACTGCATTCTAGTT  
GTGGTTTGTCCAAACTCATCAATGTATCTTAAAGCTTGGCGTAATCATGGTCATAGCTGTTTCTGTGTGAAATGTTATCCGCT  
CACAATCCACACAACATACGAGCCGGAAGCATAAAGTGTAAGCCTGGGGTGCCTAATGAGTGAGCTAACTCACATTAATT  
GCGTTGCGCTCACTGCCGCTTTCAGTCCGGAAACCTGTGTCGACGCTGCATTAATGAATCGGCCAACGCGCGGGGAGA  
GGCGGTTTGCATTTGGGCGCTTTCGCTTCCGCTCCTCGTCACTGACTCGTGCCTCGGTCGTTCCGCTGCGGGCAGCGGTAT  
CAGCTCACTCAAAGGCGTAATACGTTATCCACAGAATCAGGGGATAACGCAGGAAAGAACATGTGAGCAAAAGGCCAG  
CAAAAGGCCAGGAACCGTAAAAAGGCCGCTTGTGCGGTTTTTCCATAGGCTCCGCCCCCTGACGAGCATCACAAAAT  
CGACGCTCAAGTCAGAGGTGGCGAAACCCGACAGGACTATAAAGATACCAGGCGTTTCCCTTGGAAGTCCCTCGTGCGC  
TCTCCTGTTCCGACCTGCCGCTTACCGGATACCTGTCCGCTTCTCCCTTCGGGAAGCGTGGCGCTTCTCATAGCTCAGC  
CTGTAGGTATCTCAGTTCGGTGTAGGTCGTTCCGCTCAAGCTGGGCTGTGTGCACGAACCCCCGTTACGCCGACCGCTGC  
GCCTTATCCGGTAACTATCGTCTTGAAGTCAACCCGGTAAAGACACGACTTATCGCCACTGGCAGCAGCCACTGGTAAACAGGA  
TTAGCAGAGCGAGGTATGTAGGCGGTGCTACAGAGTTCTTGAAGTGGTGGCCTAACTACGGCTACACTAGAAGAACAGTATT  
TGGTATCTGCGCTCTGCTGAAGCCAGTTACCTTCGGAAAAAGAGTTGGTAGCTCTTGATCCGGCAAACAACACCAGCTGGT  
AGCGGTGGTTTTTTTGTGTTGCAAGCAGCAGATTACGCGCAGAAAAAAGGATCTCAAGAAGATCCTTTGATCTTTTCTACGG  
GGTCTGACGCTCAGTGAACGAAAACCTACGTTAAGGGATTTTGGTATGAGATTATCAAAAAGGATCTTCACTTAGATCCT  
TTAAATTAATAAATGAAGTTTTAAATCAATCTAAAGTATATATGAGTAAACTTGGTCTGACAGTTACCAATGCTTAATCAGTGA  
GGCACCTATCTCAGCGATCTGTCTATTTCTGTTATCCATAGTTGCCTGACTCCCCGTCGTGTAGATAACTACGATACGGGAGG  
GCTTACCATCTGGCCCCAGTGTGCAATGATACCGCGAGACCCAGCTCACCGGCTCCAGATTATCAGCAATAAACCAGCC  
AGCCGGAAGGGCCGAGCGCAGAAGTGGTCTGCAACTTTATCCGCTCCATCCAGTCTATTAATTGTTGCCGGAAGCTAGA  
GTAAGTAGTTCGCCAGTTAATAGTTTGCGCAACGTTGTTGCCATTGCTACAGGCATCGTGGTGTACGCTCGTCTGTTGGTAT  
GGCTTCAATCAGCTCCGGTCCCAACGATCAAGGCGAGTTACATGATCCCCATGTTGTGCAAAAAAGCGGTTAGCTCCTC  
GGTCTCCGATCGTTGTGAGAAGTAAGTTGGCCGAGTGTATCACTCATGGTTATGGCAGCACTGCATAATTCTCTTACTGT  
CATGCCATCCGTAAGATGCTTTTCTGTGACTGGTGAGTACTCAACCAAGTCATTCTGAGAATAGTGTATGCGGCGACCGAGTT  
GCTCTTGCCCGCGCTCAATACGGGATAATACCGCGCCACATAGCAGAACTTTAAAAGTGTCTCATATTGAAAAACGTTCTTC  
GGGGCGAAAACCTCAAGGATCTTACCCTGTTGAGATCCAGTTCGATGTAACCCACTCGTGCACCCAACTGATCTTCAGCA  
TCTTTACTTTCACCAGCGTTTCTGGGTGAGCAAAAACAGGAAGGCAAAATGCCGCAAAAAAGGGAATAAGGGCGACACG  
GAAATGTTGAATACTCATACTTTCCTTTTTCAATTCAGAAGAACTCGTCAAGAAGGCGATAGAAGGCGATGCGCTGCGAAT  
CGGGAGCGGCGATACCGTAAAGCACGAGGAAGCGGTACGCCATTCGCCGCAAGCTCTTCAGCAATATCACGGGTAGCCA  
ACGCTATGCTCTGATAGCGGTCCGCCACACCCAGCCGCCACAGTCGATGAATCCAGAAAAAGCGGCCATTTTCCACCATGAT  
ATTCGGCAAGCAGGCATCGCCATGGGTCACGACGAGATCCTCGCCGTCGGGCATGCGCGCCTTGAGCCTGGCGAACAGTTC  
GGCTGGCGCGAGCCCCTGATGCTCTTCGTCCAGATATCCTGATCGACAAGACCGGCTTCCATCCGAGTACGTGCTCGCTCG  
ATGCGATGTTTCGCTTGGTGGTGAATGGGAGGTAGCCGGATCAAGCGTATGCAGCCGCCGATTGCATCAGCCATGATGG  
ATACTTTCTCGGCAGGAGCAAGGTGGGATGACAGGAGATCCTGCCCGGCACTTCGCCCAATAGCAGCCAGTCCCTTCCCG  
CTTCAGTGACAACGTCGAGCACAGCTGCGCAAGGAACGCCCGTCTGTGGCCAGCCACGATAGCCGCGCTGCCTCGTCTGCA  
GTTCAATCAGGGCACCGGACAGGTCGGTCTTGACAAAAAGAACCGGGCGCCCCTGCGCTGACAGCCGGAACACGGCGGCA

TCAGAGCAGCCGATTGTCTGTTGTGCCAGTCATAGCCGAATAGCCTCTCCACCCAAGCGGCCGAGAACCTGCGTGCAATC  
CATCTTGTTCATCATGCGAAACGATCCTCATCCTGTCTCTTGATCAGATCTTGATCCCCTGCGCCATCAGATCCTTGGCGGCA  
AGAAAGCCATCCAGTTTACTTTGCAGGGCTTCCCAACCTTACCAGAGGGCGCCCCAGCTGGCAATCCGGTTCGCTTGTGT  
CCATAAAACCGCCCAGTCTAGCTATCGCCATGTAAGCCACTGCAAGCTACCTGCTTTCTTTTGCCTTTCGCTTTTCCCTTG  
TCCAGATAGCCCAGTAGCTGACATTCATCCGGGGTCAGCACCGTTTCTGCGGACTGGCTTTCTACGTGTTCCGCTTCCCTTAG  
CAGCCCTTGCGCCCTGAATTTTGTAAAATTCGCGTTAAATTTTGTAAAATCAGCTCATTTTTTAACCAATAGGCCGAAATCG  
GAAAATCCCTTATAAATCAAAAGAATAGACCGAGATAGGGTTGAGTGTGTTCCAGTTTGAACAAGAGTCCACTATTA  
GAACGTGGACTCCAACGTCAAAGGGCGAAAAACCGTCTATCAGGGCGATGGCCACTACGTGAACCATCACCTAATCAAG  
TTTTTTGGGGTCGAGGTGCCGTAAAGCACTAAATCGGAACCCTAAAGGGAGCCCCGATTTAGAGCTTGACGGGGAAAGCC  
GGCGAACGTGGCGAGAAAGGAAGGAAGAAAGCGAAAGGAGCGGGCGCTAGGGCGCTGGCAAGTGTAGCGGTCACGCTG  
CGCGTAACCACCACCCGCCGCGCTTAATGCGCGCTACAGGGCGCGTCCATTGCCATTACGGCTGCGCAACTGTTGGG  
AAGGGCGATCGGTGCGGGCCTTTCGCTATTACGCCAGCTGGCGAAAGGGGGATGTGCTGCAAGGCGATTAAGTTGGGTAA  
CGCCAGGGTTTTCCAGTCACGACGTTGTAAAACGACGGCCAGTGAATTG
